# Supplementary material
Source: PubMed Central journal article supplement (PMC3429353)

# Indole Alkaloids from Two Cultured Cyanobacteria, *Westiellopsis* sp. and *Fischerella muscicola*

Hyunjung Kim<sup>a</sup>, Daniel Lantvit<sup>a</sup>, Chang Hwa Hwang<sup>a</sup>, David J. Kroll<sup>b</sup>, Steven M. Swanson<sup>a</sup>, Scott G. Franzblau<sup>a</sup>, Jimmy Orjala<sup>a,\*</sup>

<sup>a</sup> Department of Medicinal Chemistry and Pharmacognosy, College of Pharmacy, University of Illinois at Chicago, Chicago, IL 60612, USA

<sup>b</sup> Department of Pharmaceutical Sciences, College of Science and Technology, North Carolina Central University, Durham, NC 27707, USA

## Supplementary Content

\* To whom correspondence should be addressed. Tel: 1-312-996-5583. Fax: 1-312-413-4034. E-mail: orjala@uic.edu

## **Table of contents**

- S1. <sup>1</sup>H NMR spectrum of hapalindole X (**1**)
- S2. DEPTQ spectrum **1**
- S3. COSY spectrum of **1**
- S4. HSQC spectrum of **1**
- S5. HMBC spectrum of **1**
- S6. NOESY spectrum of **1**
- S7. <sup>1</sup>H NMR spectrum of deschloro hapalindole I (**2**)
- S8. COSY spectrum of **2**
- S9. HSQC spectrum of **2**
- S10. HMBC spectrum of **2**
- S11. NOESY spectrum of **2**
- S12. <sup>1</sup>H NMR spectrum of 13-hydroxy dechlorofontonamide (**3**)
- S13. COSY spectrum of **3**
- S14. HSQC spectrum of **3**
- S15. HMBC spectrum of **3**
- S16. NOESY spectrum of **3**

S1.  $^1\text{H}$  NMR spectrum of hapalindole X (**1**)

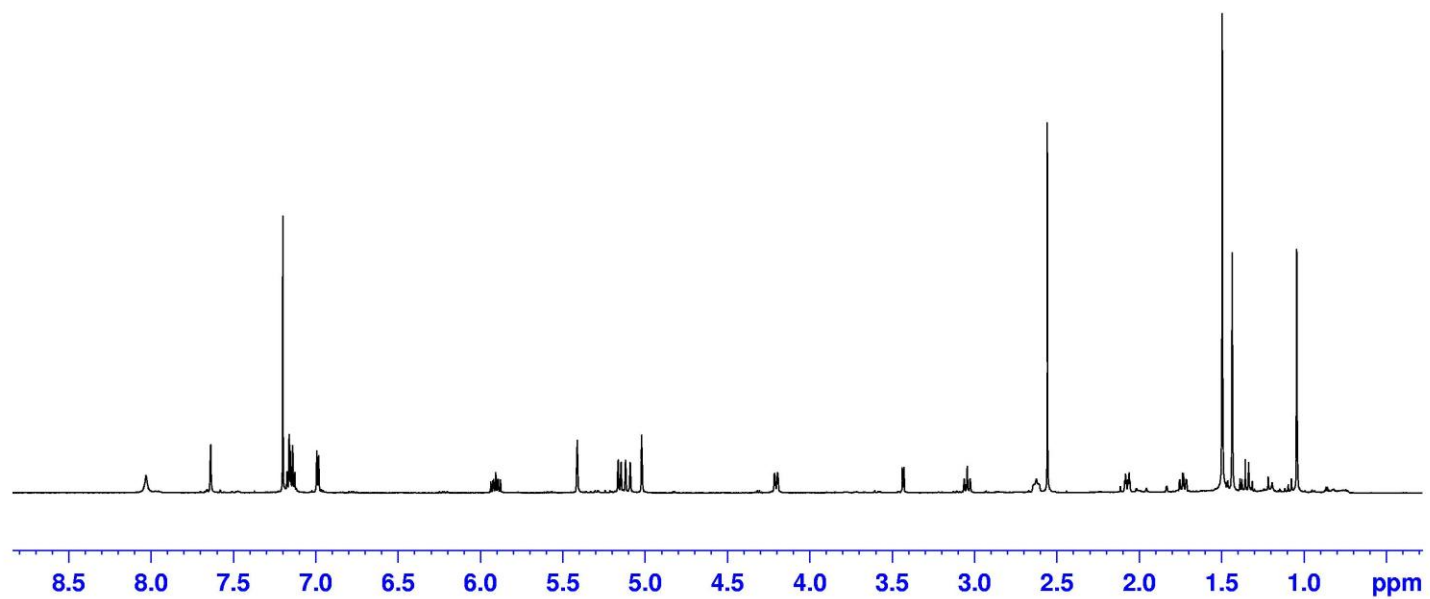

S2. DEPTQ spectrum of **1**

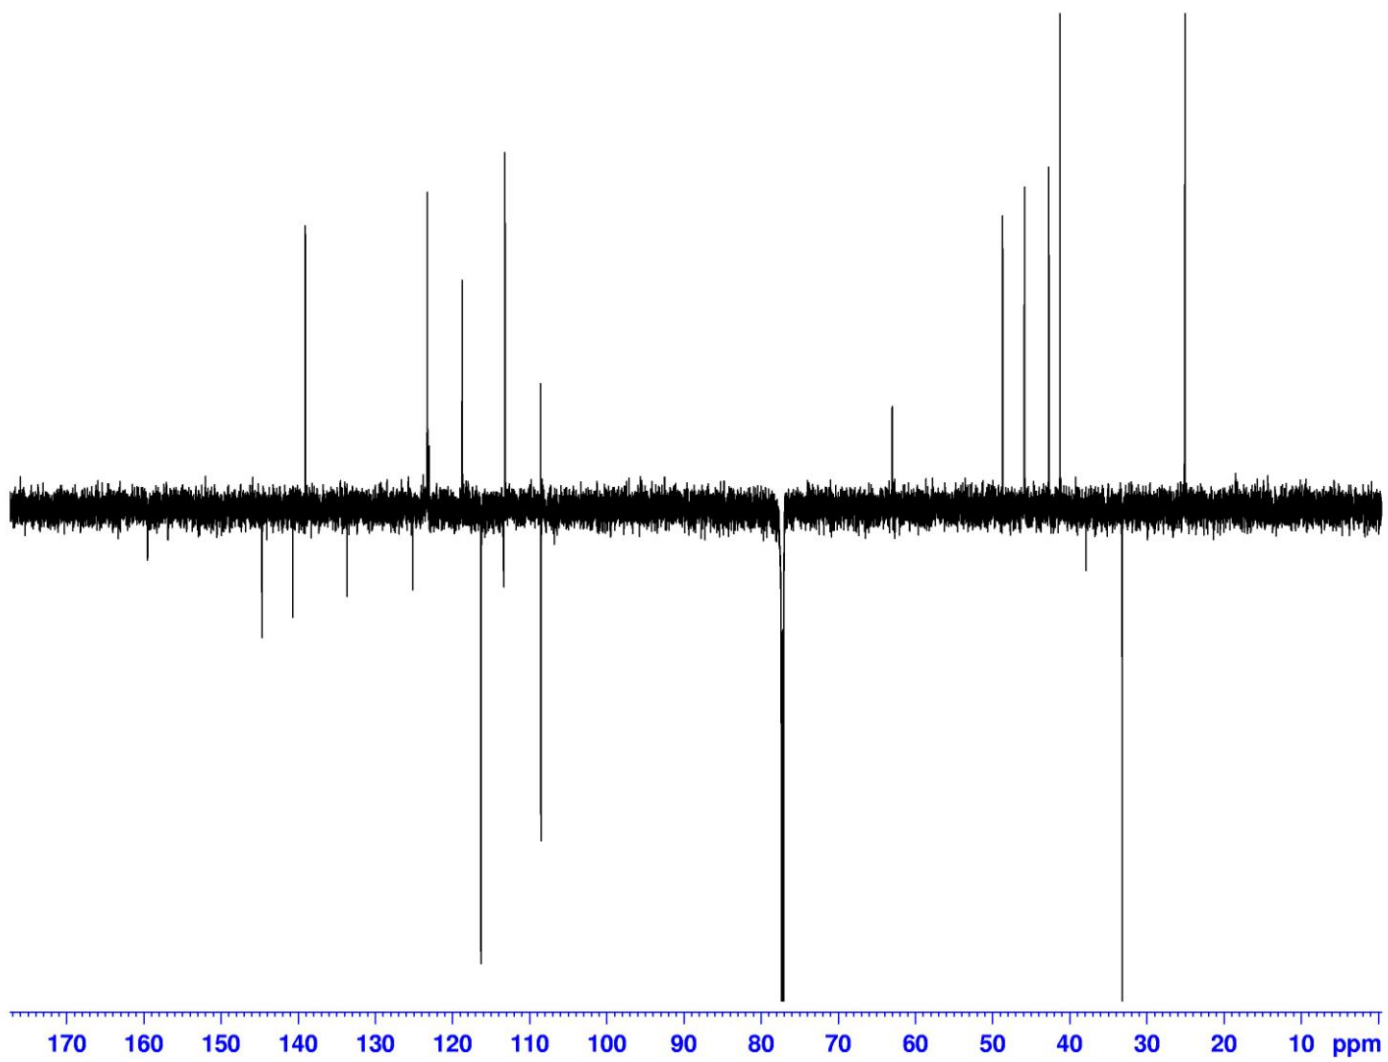

S3. COSY spectrum of **1**

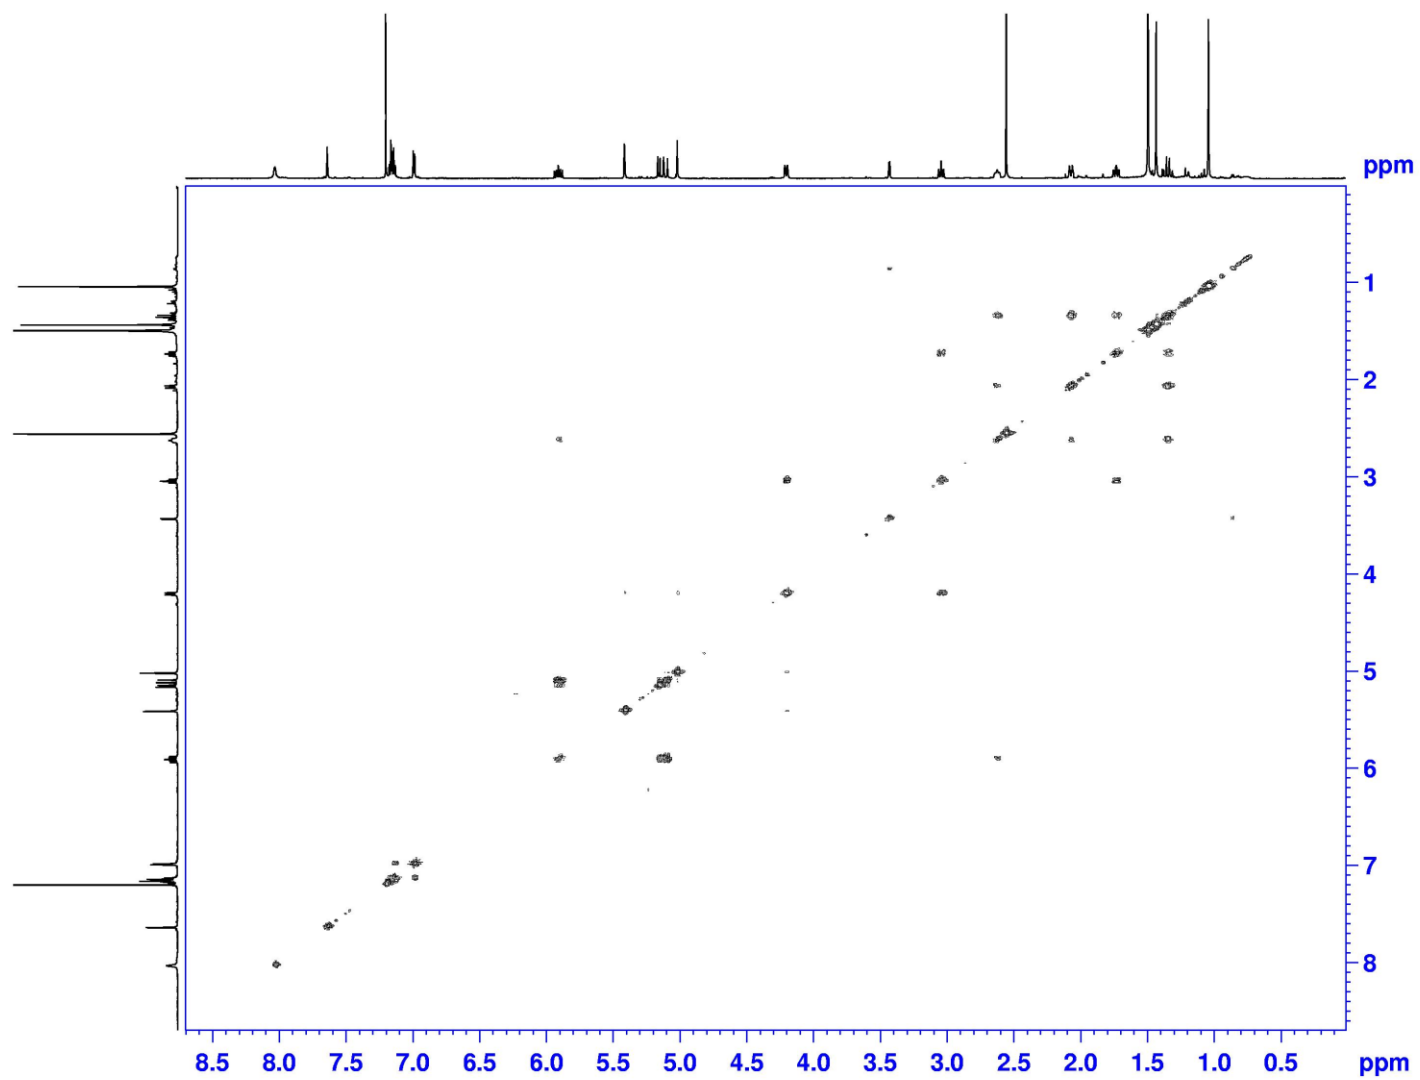

S4. HSQC spectrum of **1**

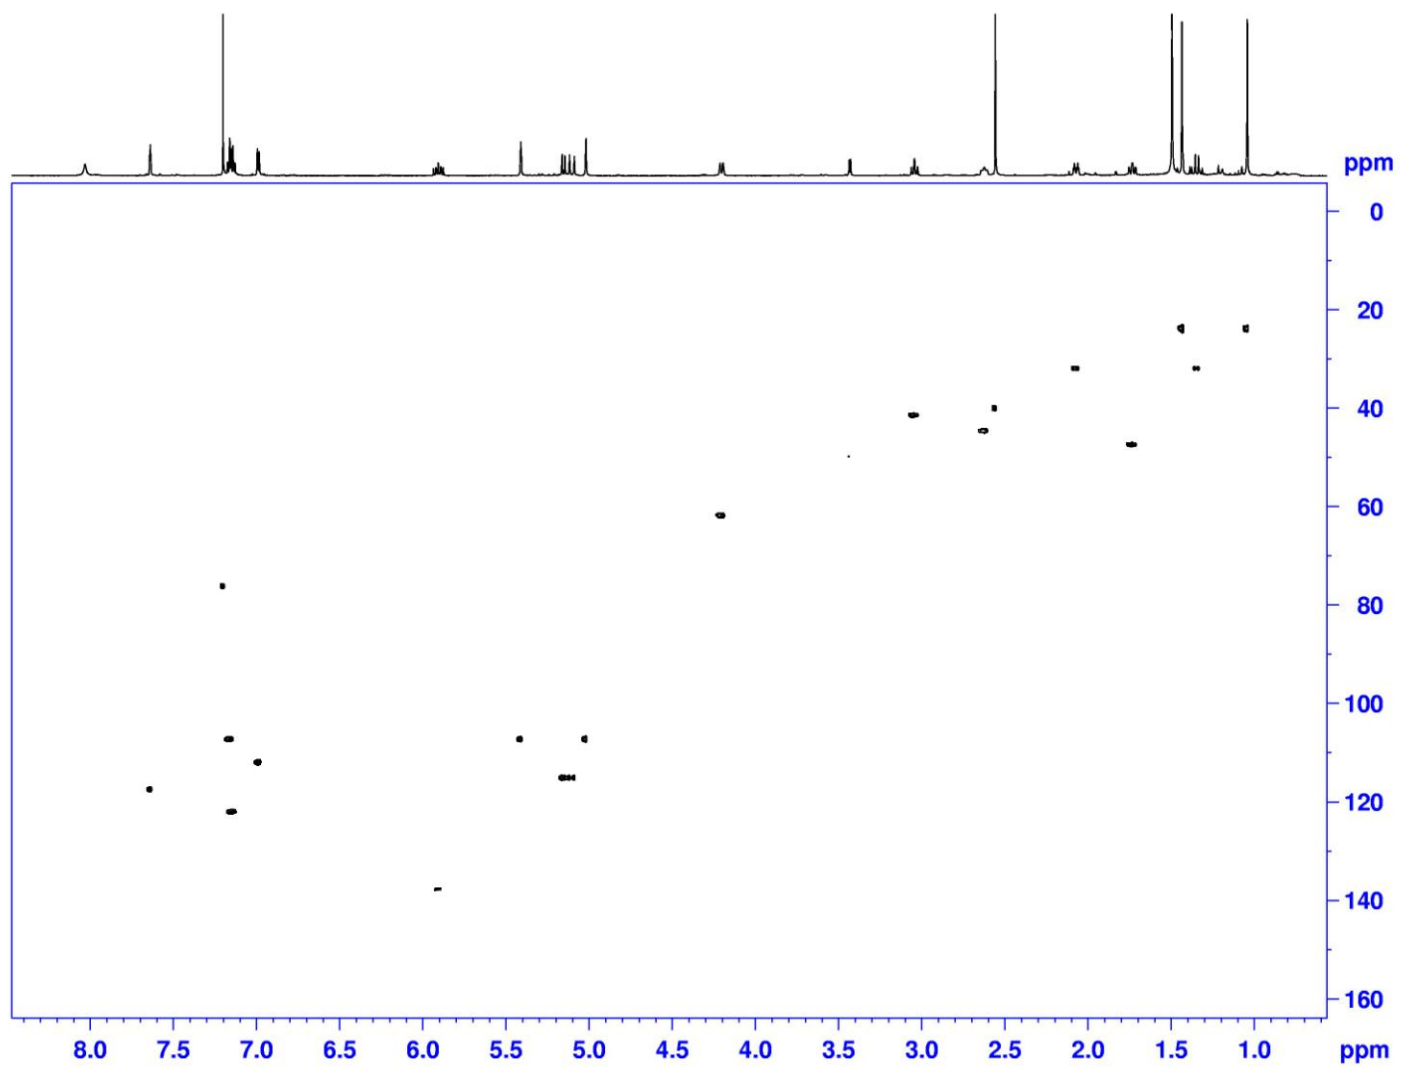

S5. HMBC spectrum of **1**

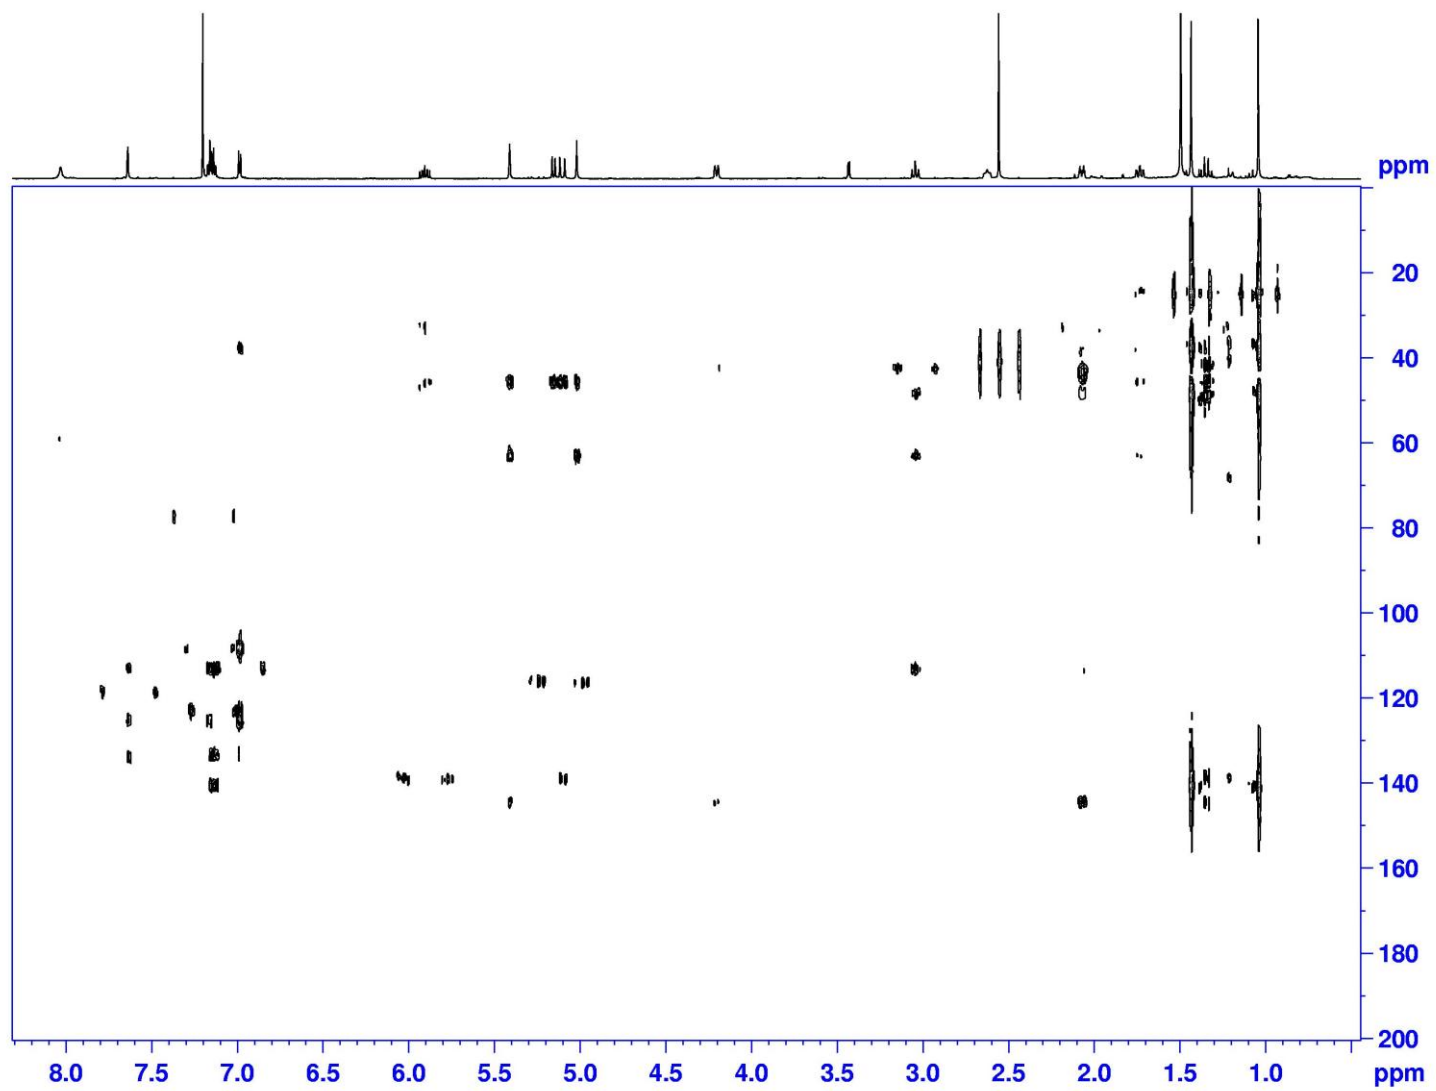

S6. NOESY spectrum of **1**

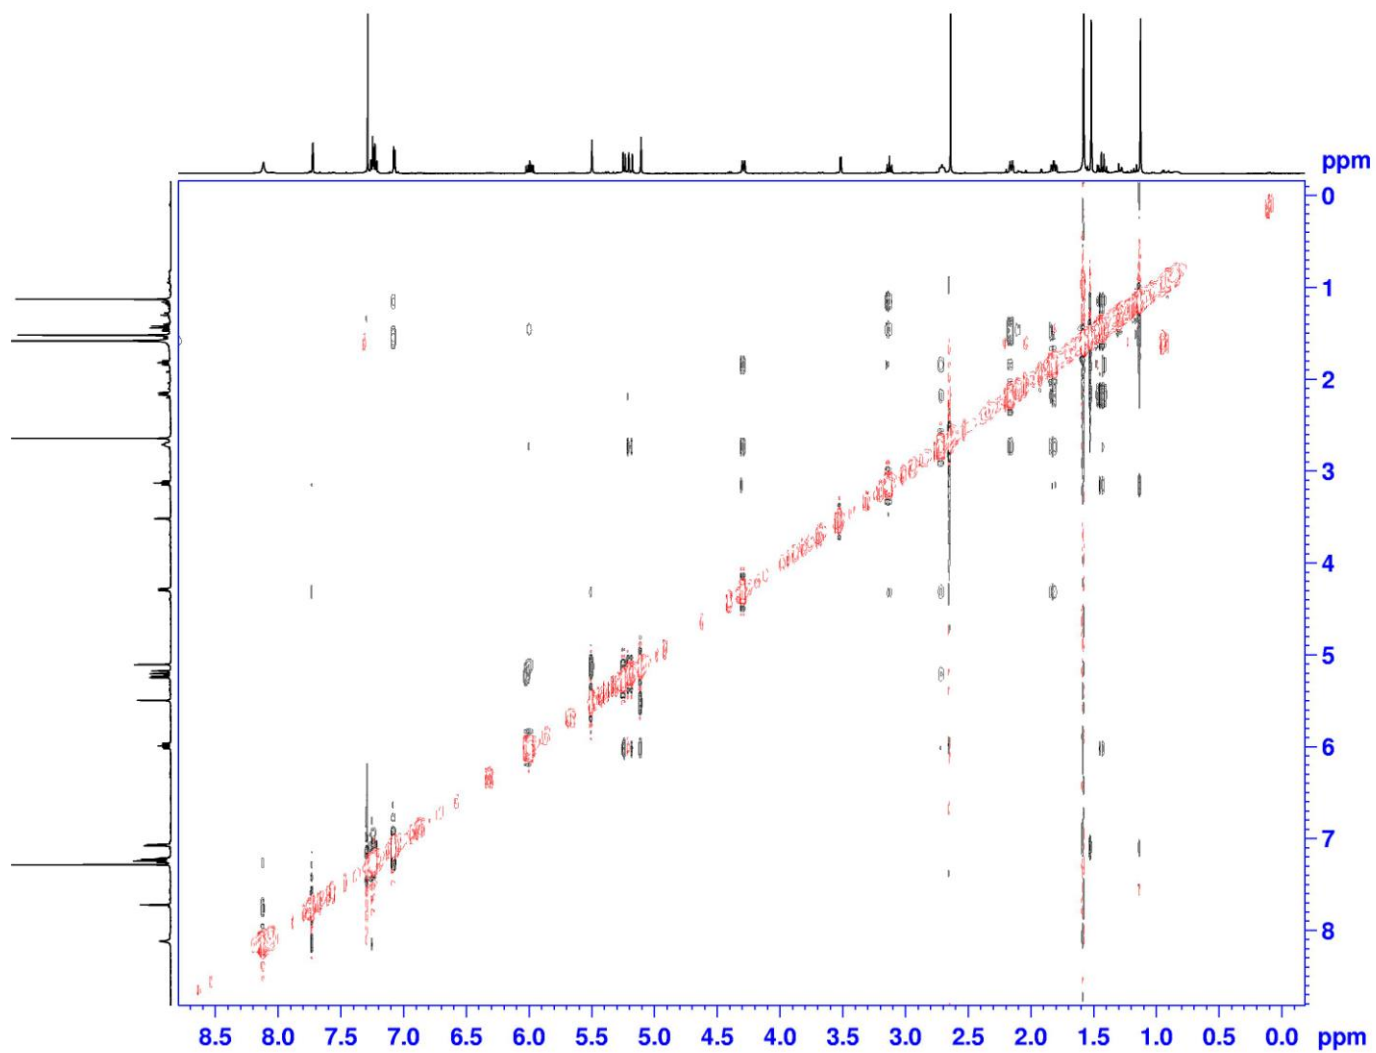



S7.  $^1\text{H}$  NMR spectrum of deschloro hapalindole I (**2**)

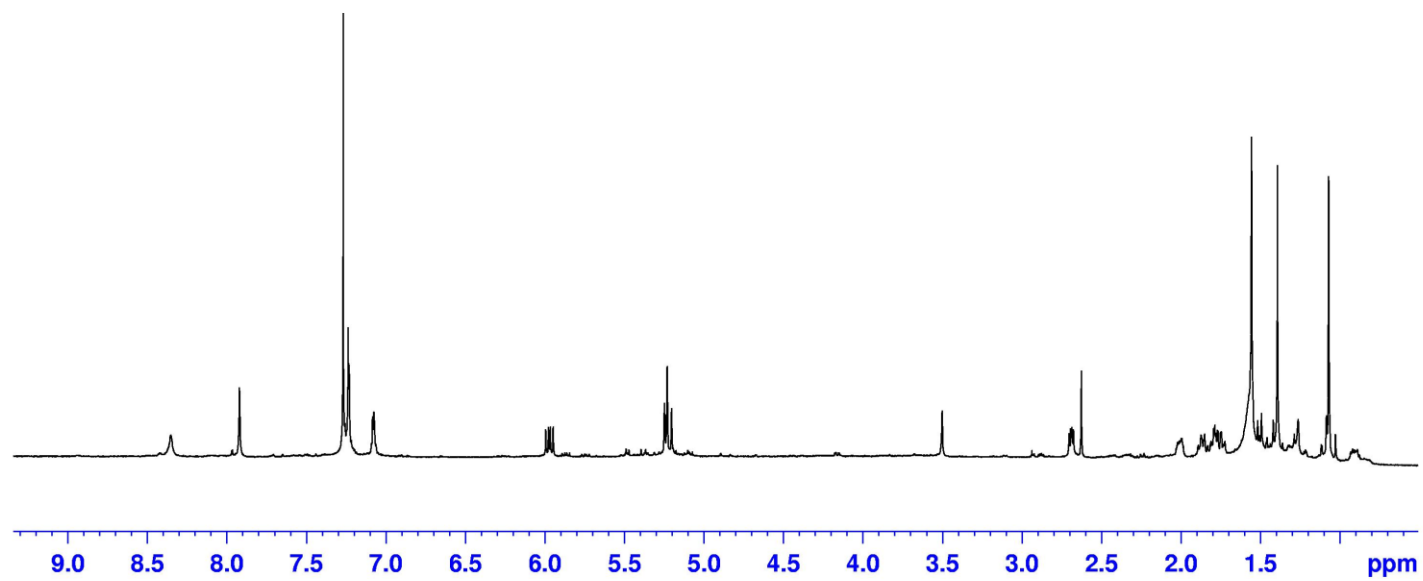

S8. COSY spectrum of 2

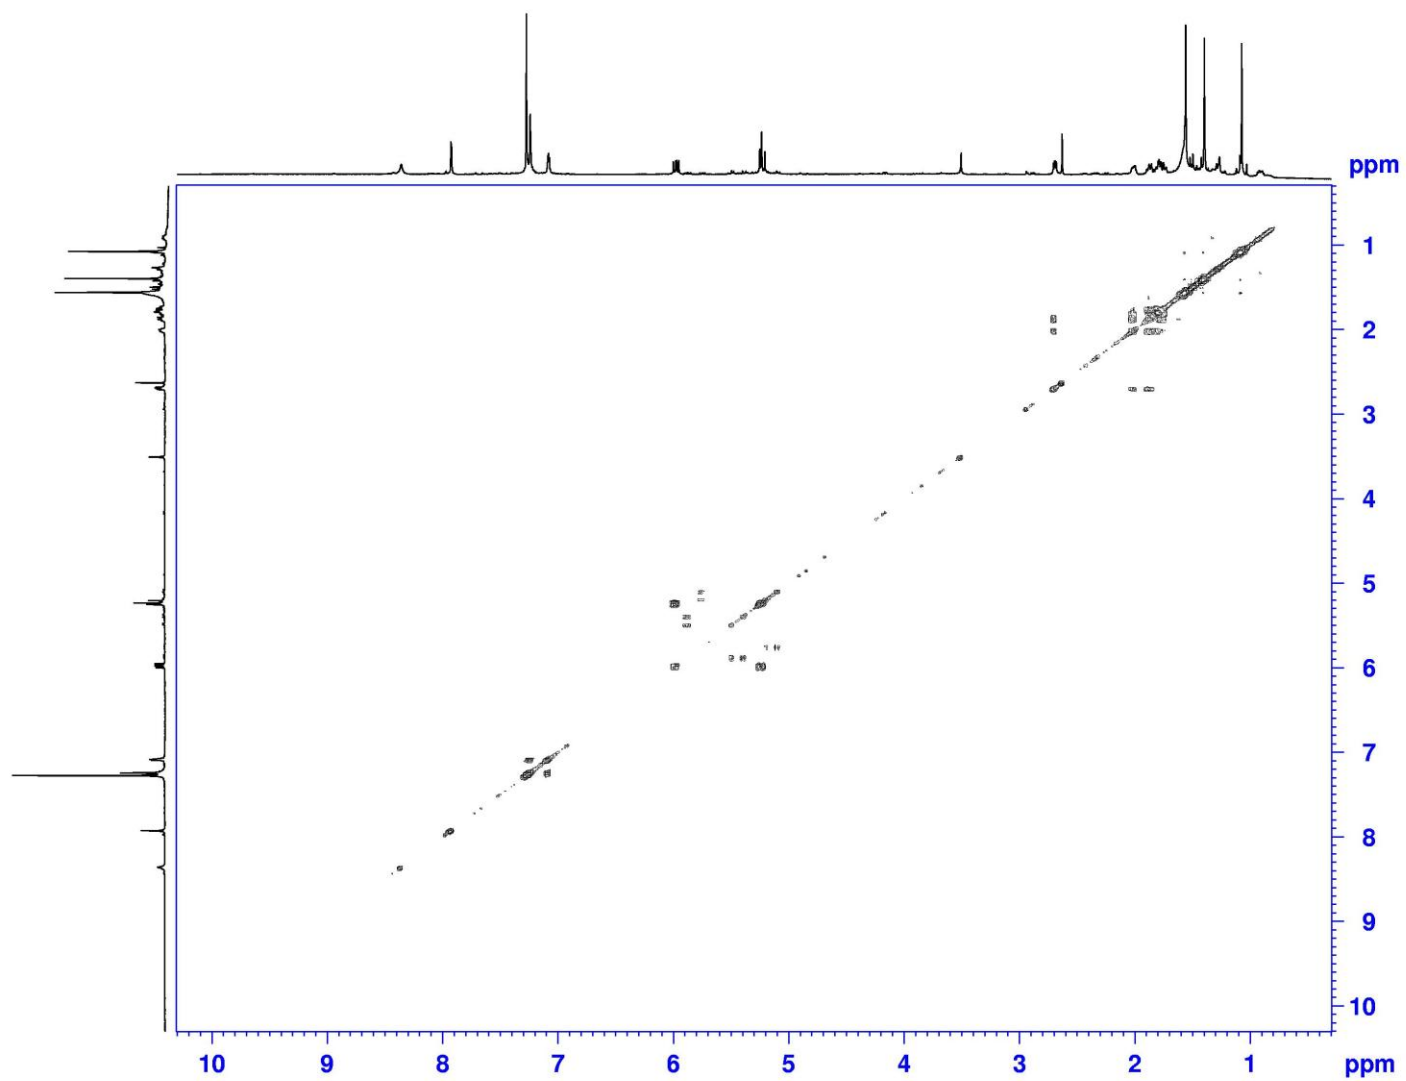

S9. HSQC spectrum of 2

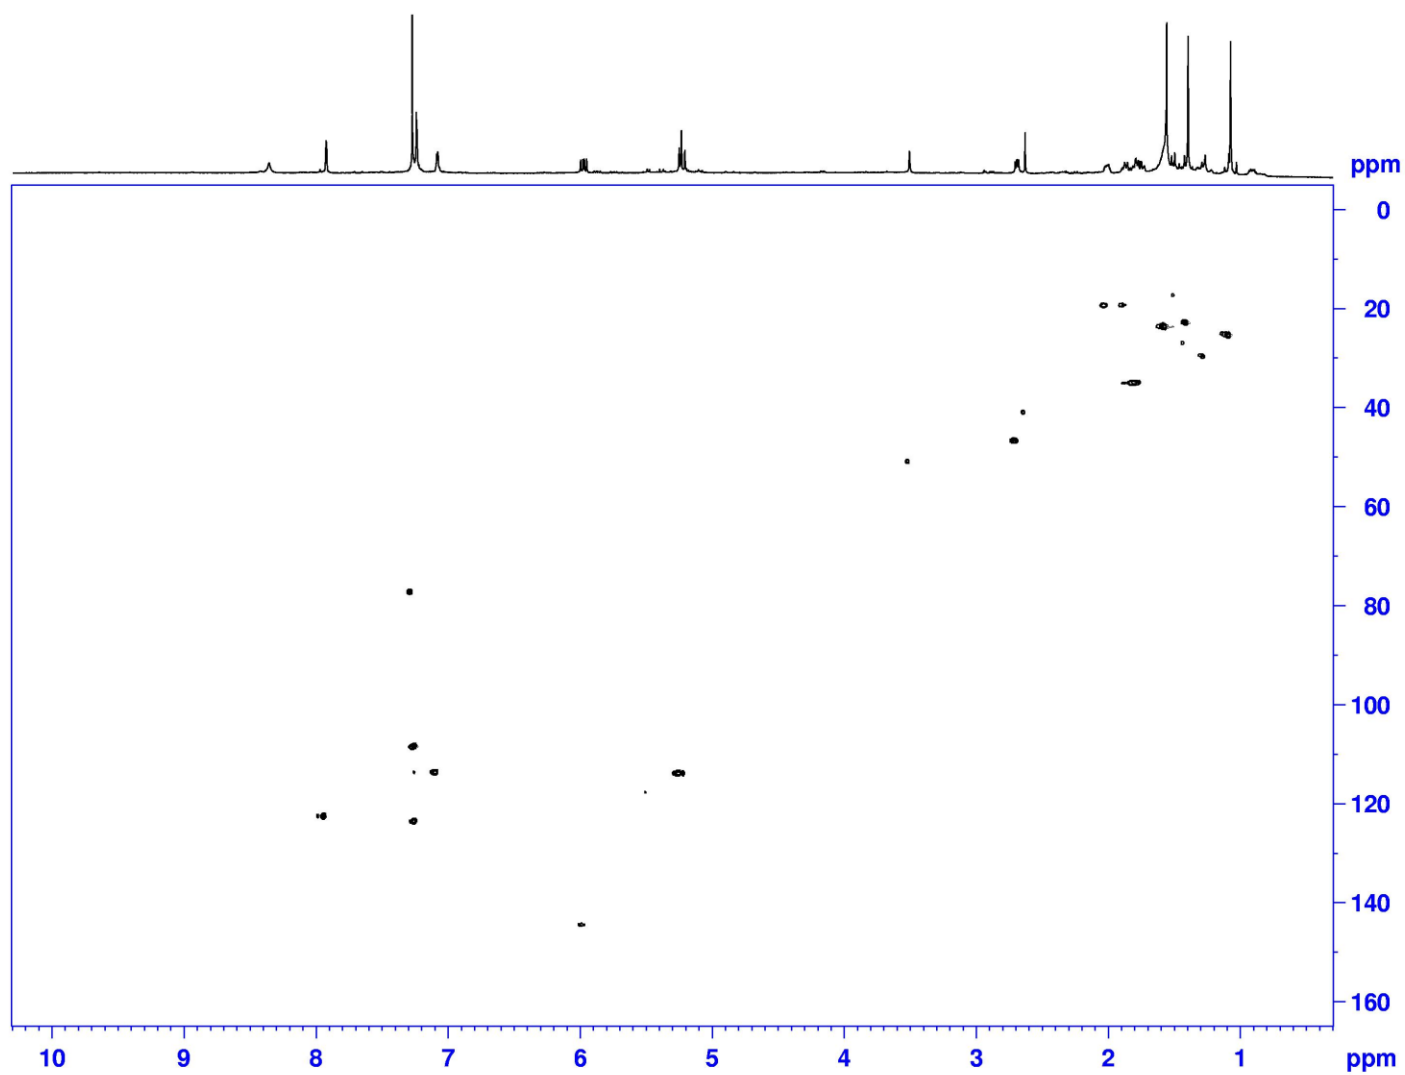

S10. HMBC spectrum of **2**

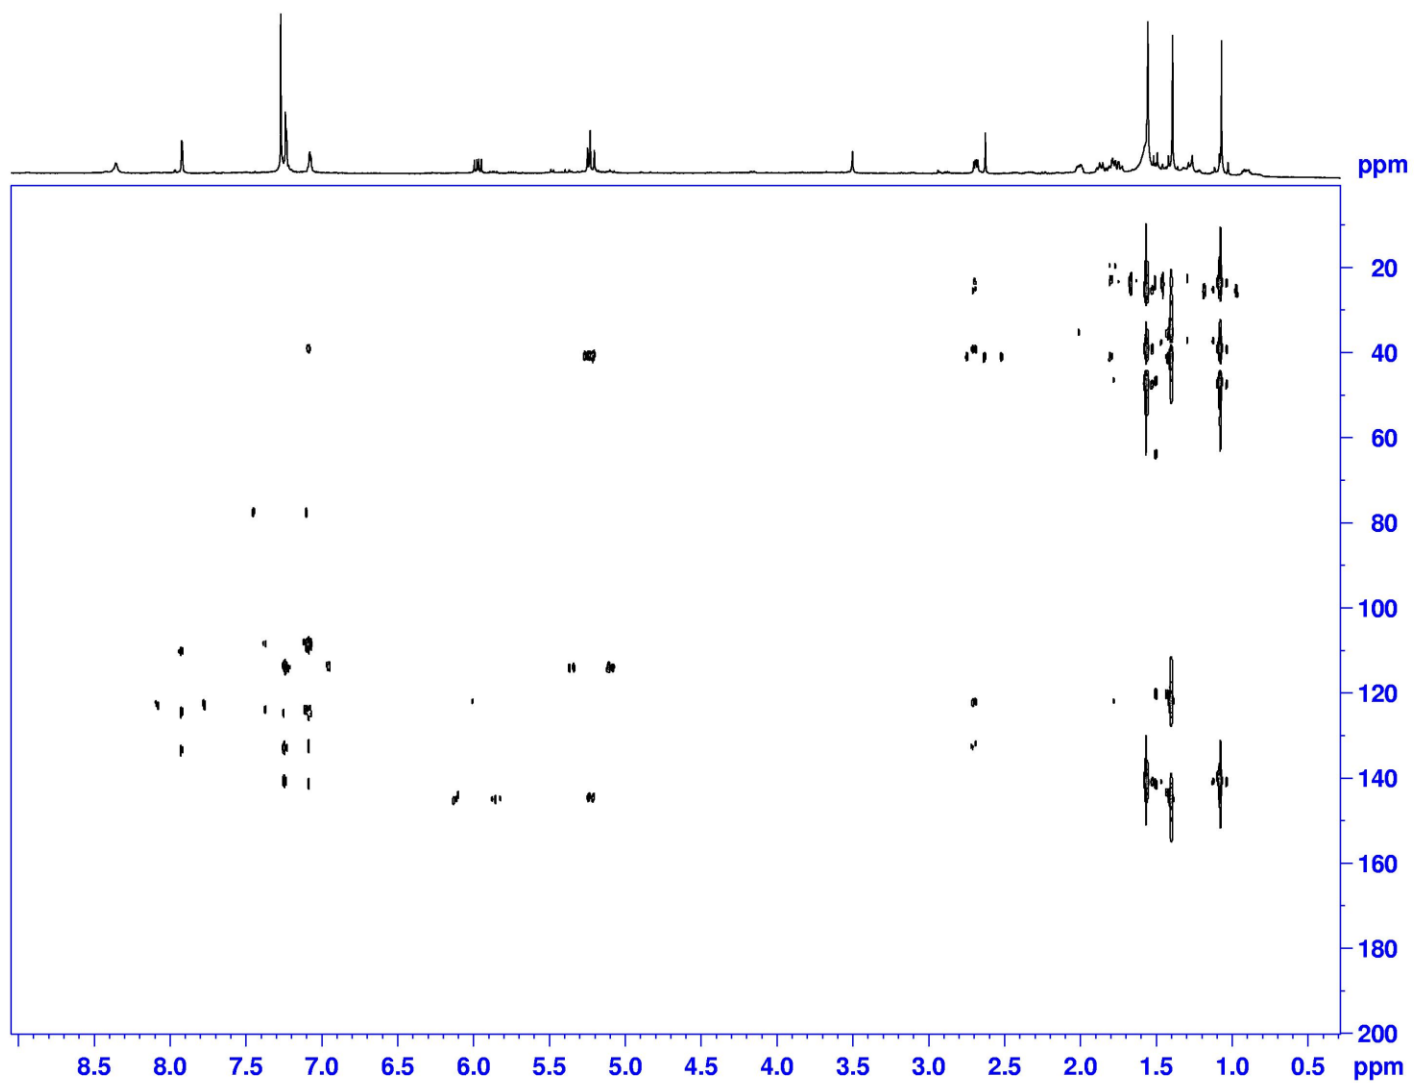

S11. NOESY spectrum of 2

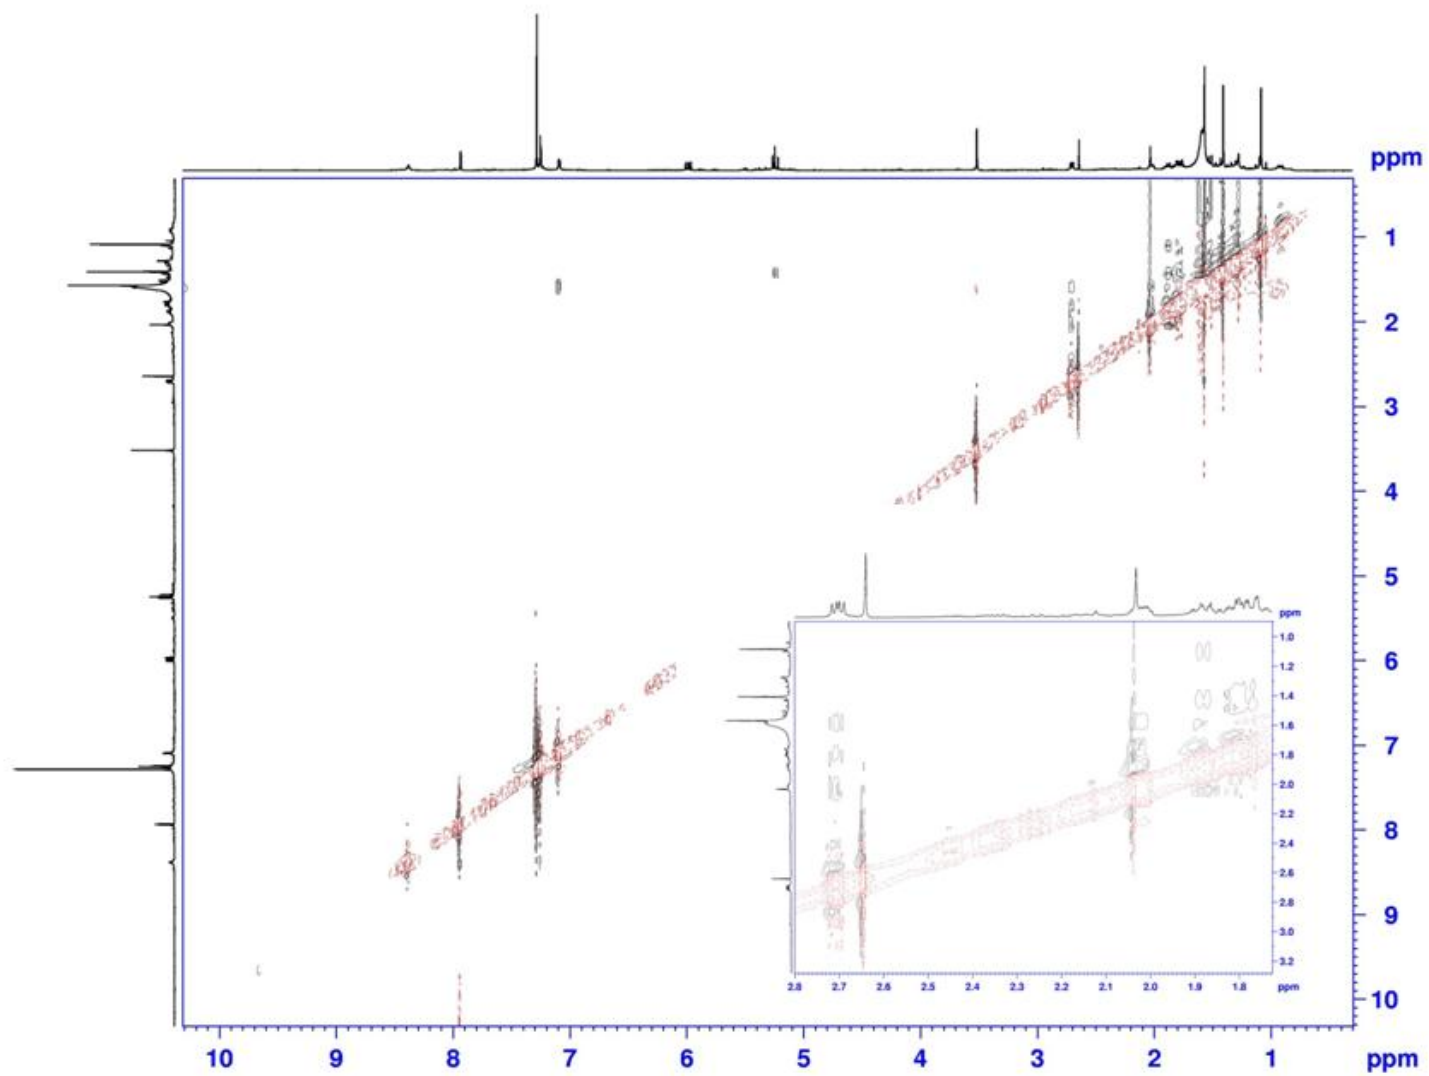

S12.  $^1\text{H}$  NMR spectrum of 13-hydroxy dechlorofontonamide (**3**)

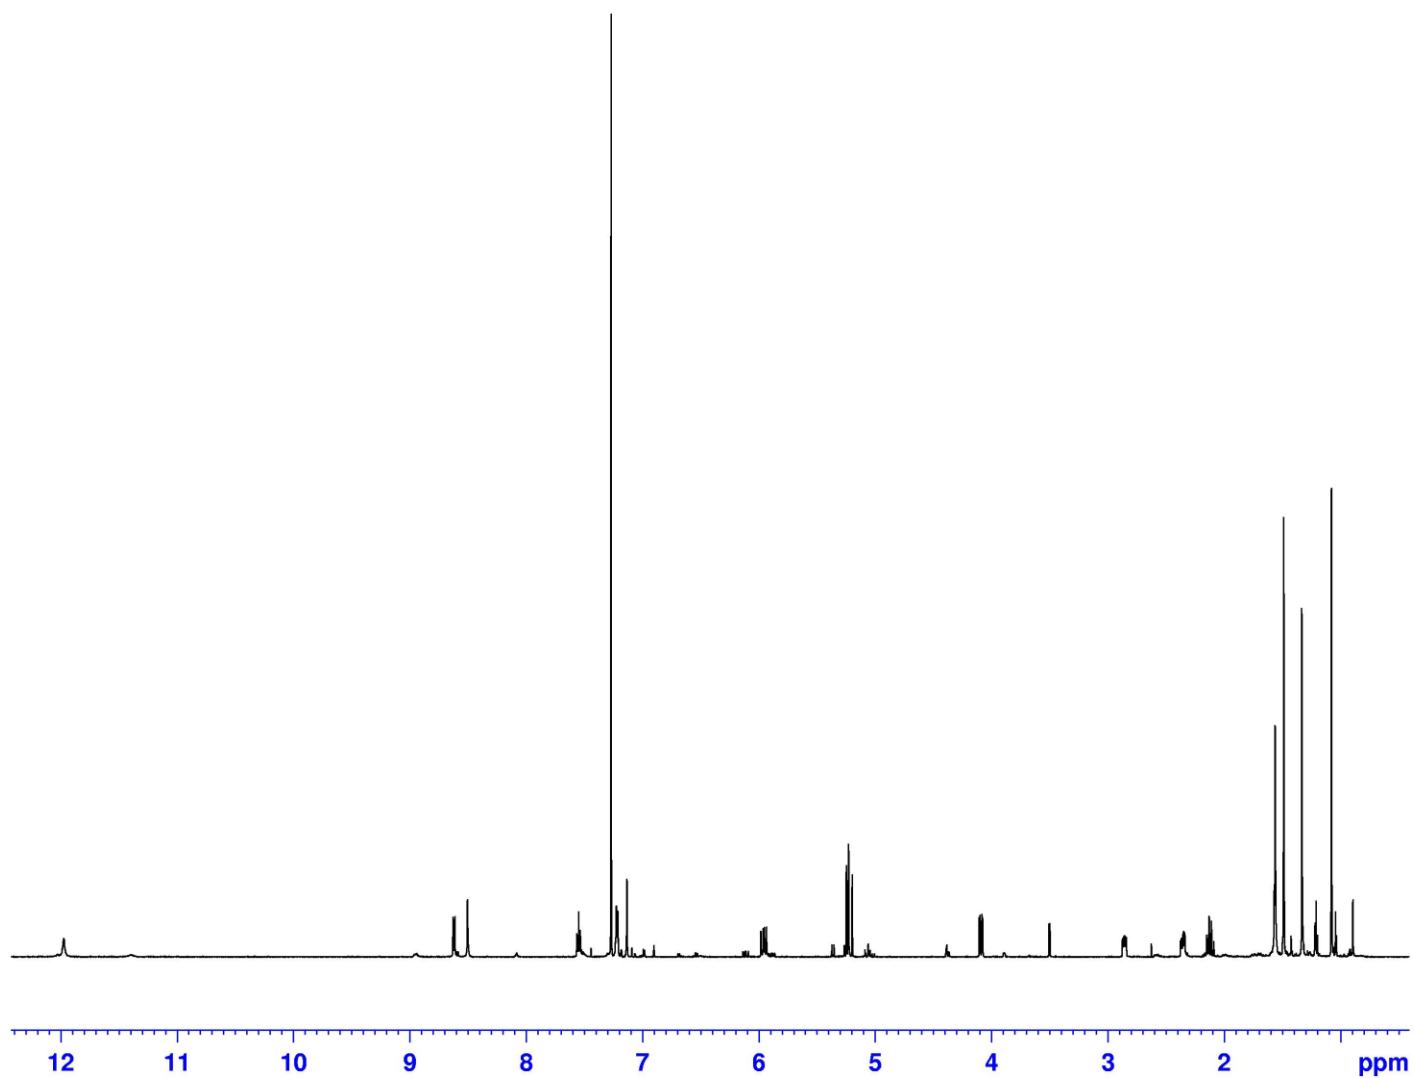

S13. COSY spectrum of 3

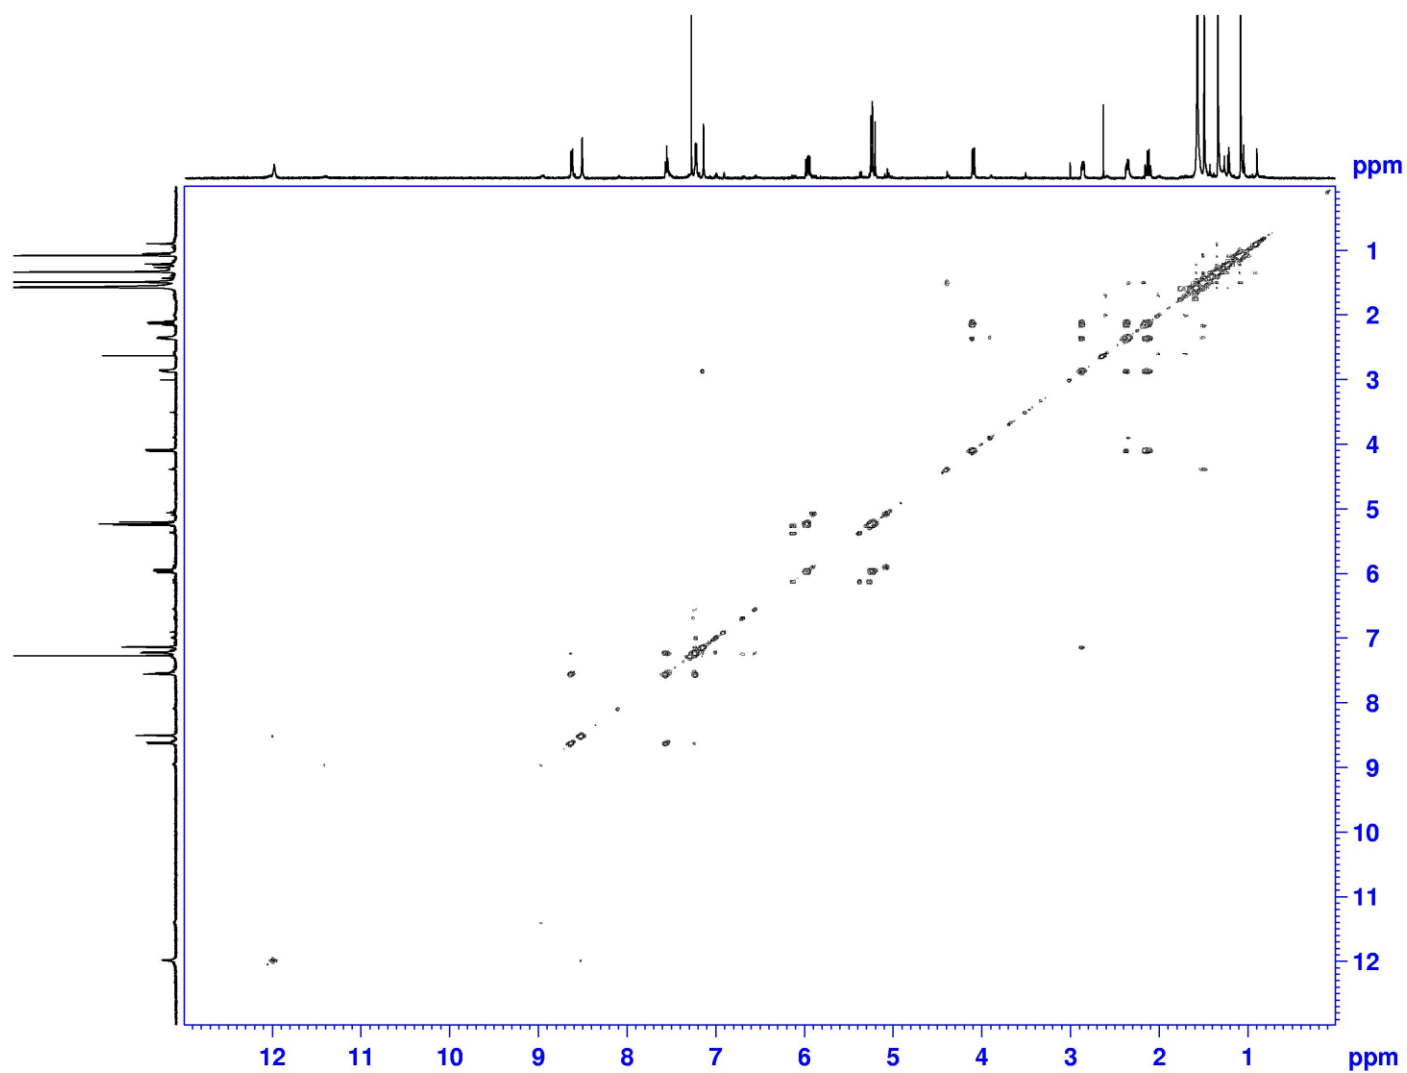

S14. HSQC spectrum of **3**

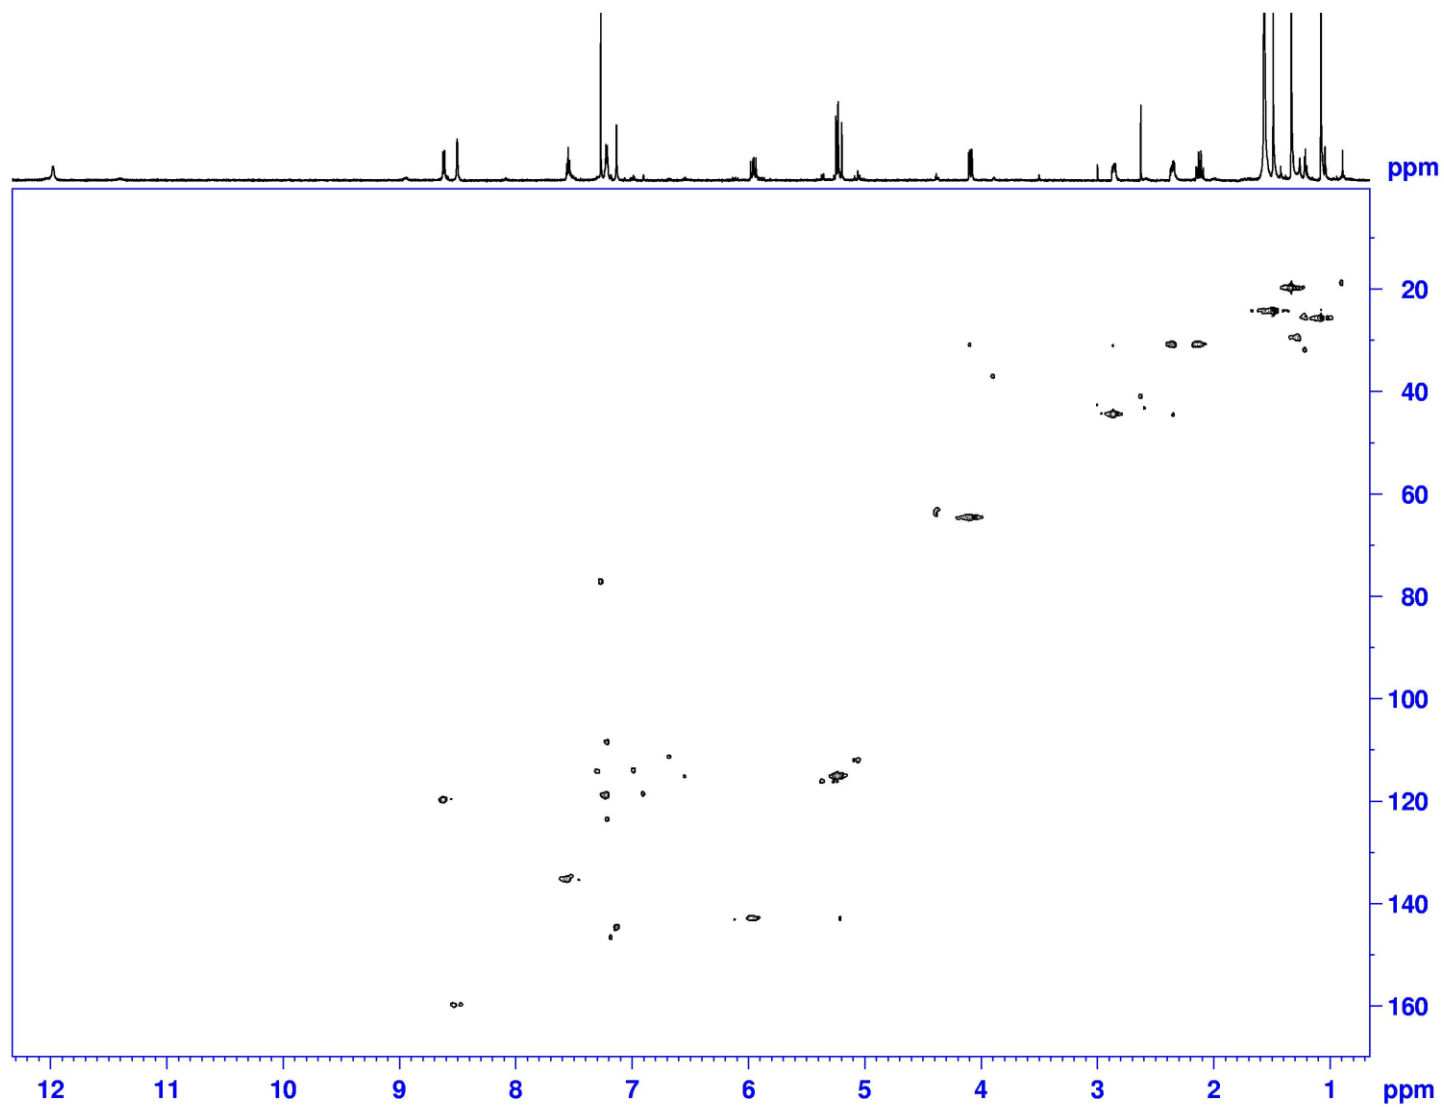



S15. HMBC spectrum of **3**

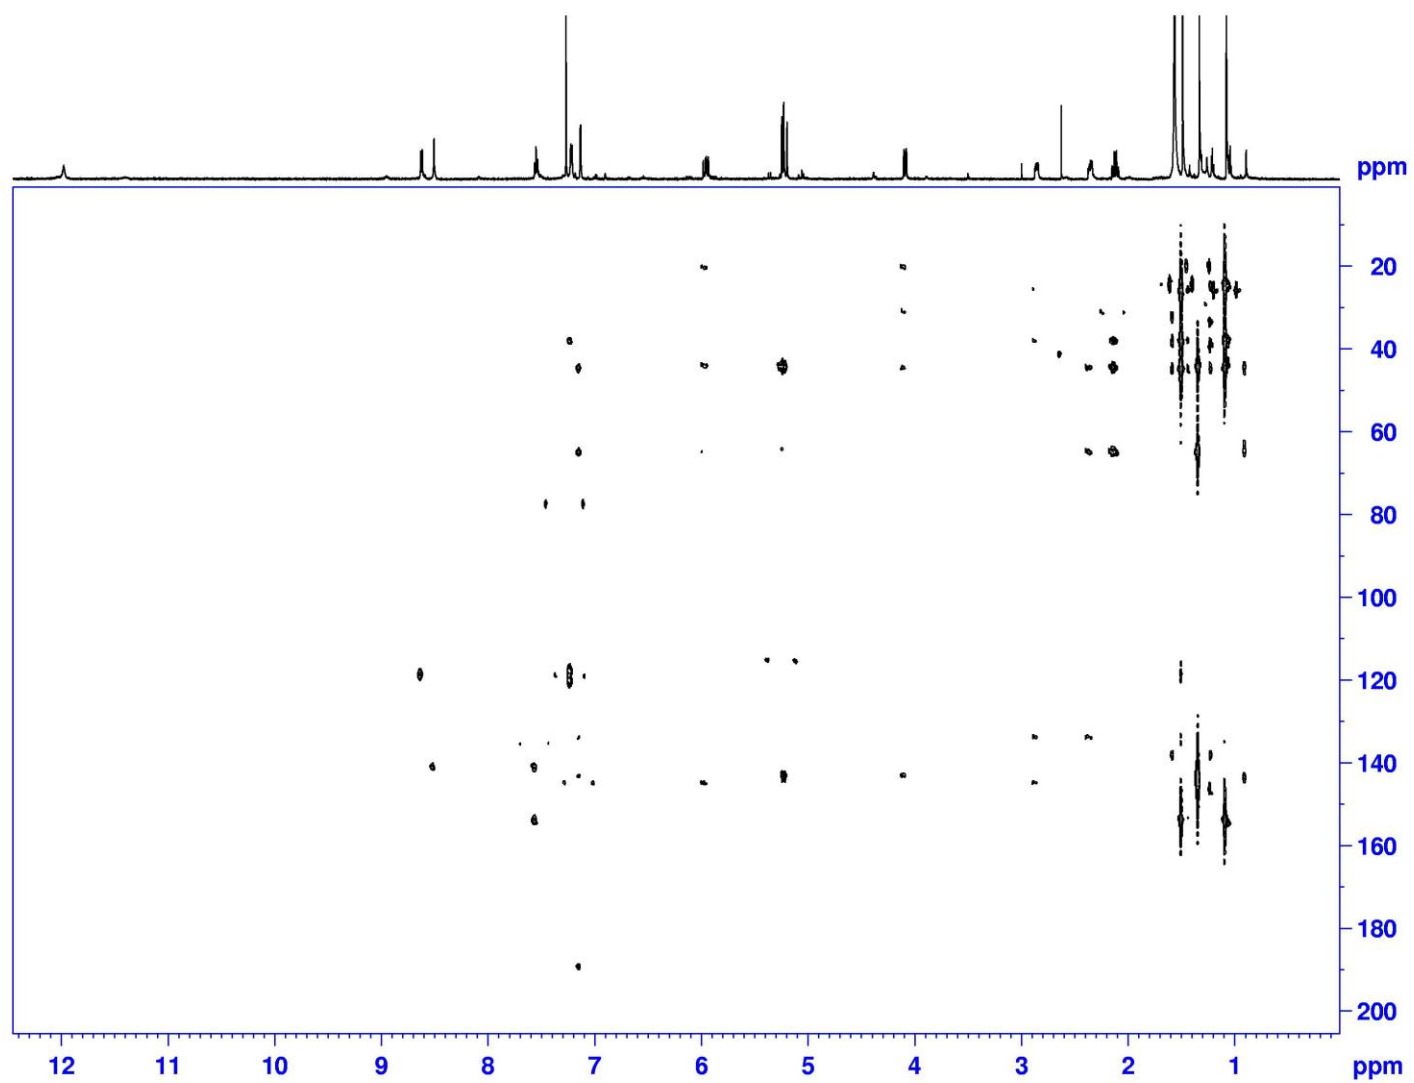

S16. NOESY spectrum of **3**

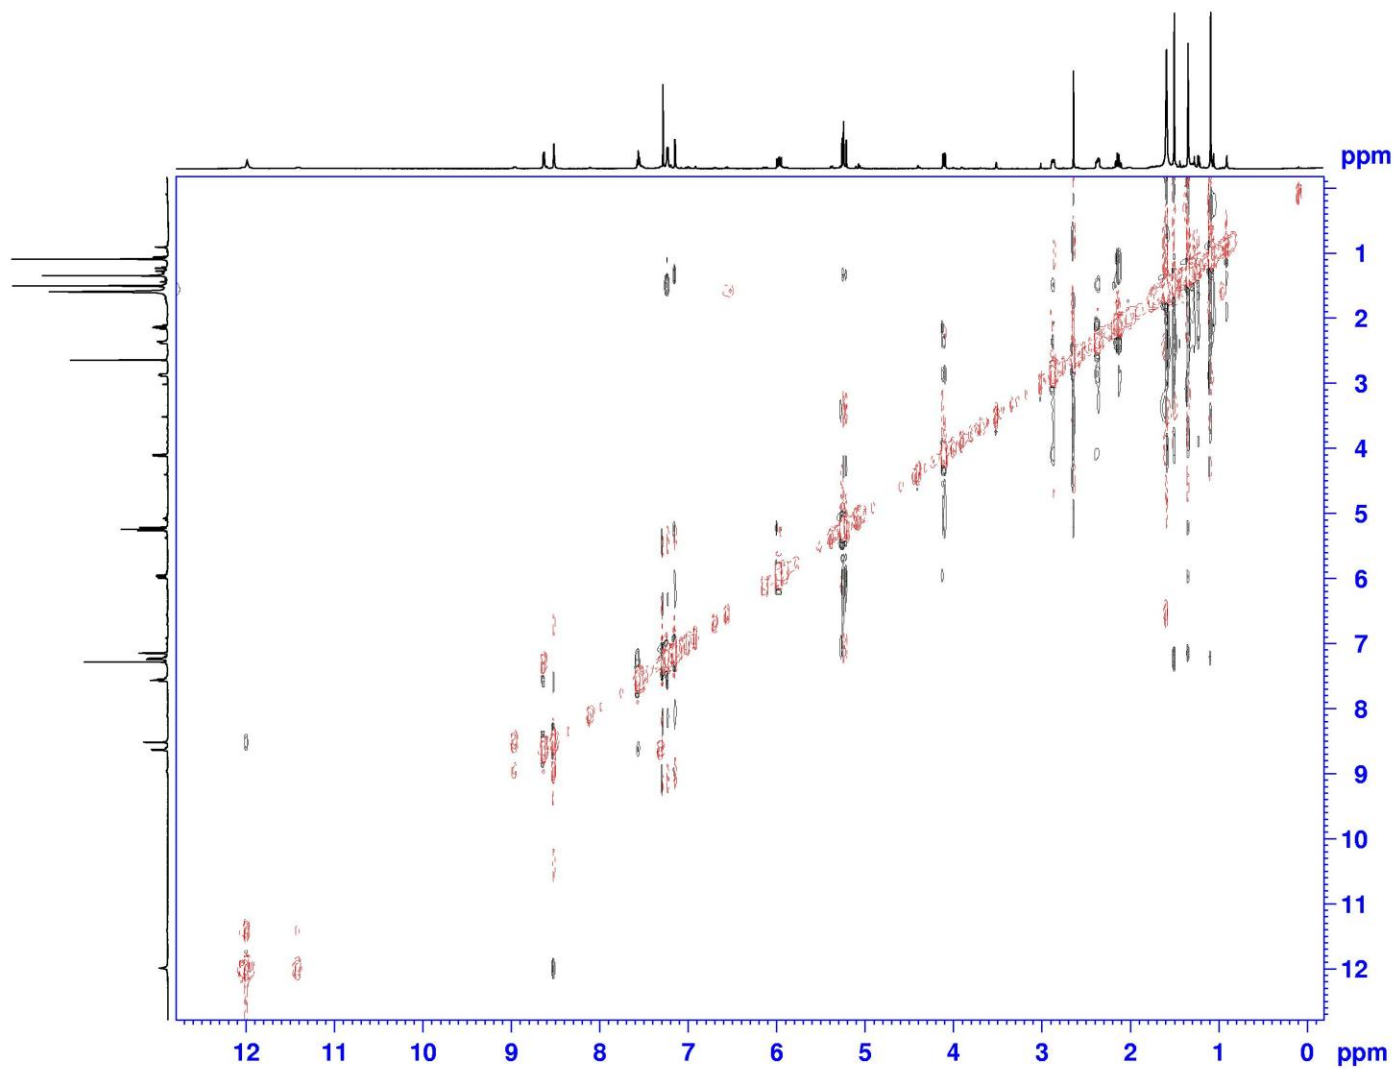

Supplement: NIHMS392703-supplement-01.pdf [file NIHMS392703-supplement-01.pdf]
